# Supplementary material for: Imidazole propionate is increased in diabetes and associated with dietary patterns and altered microbial ecology
Source: PubMed Central journal article supplement (PMC7676231; doi:10.1038/s41467-020-19589-w), 2020-11-18
Supplement: 41467_2020_19589_MOESM1_ESM.pdf [file 41467_2020_19589_MOESM1_ESM.pdf]

Supplementary information for

**Imidazole propionate is increased in diabetes and associated with dietary patterns and altered microbial ecology**

Molinaro A, Bel Lassen P, et al.

## Supplementary Figure 1

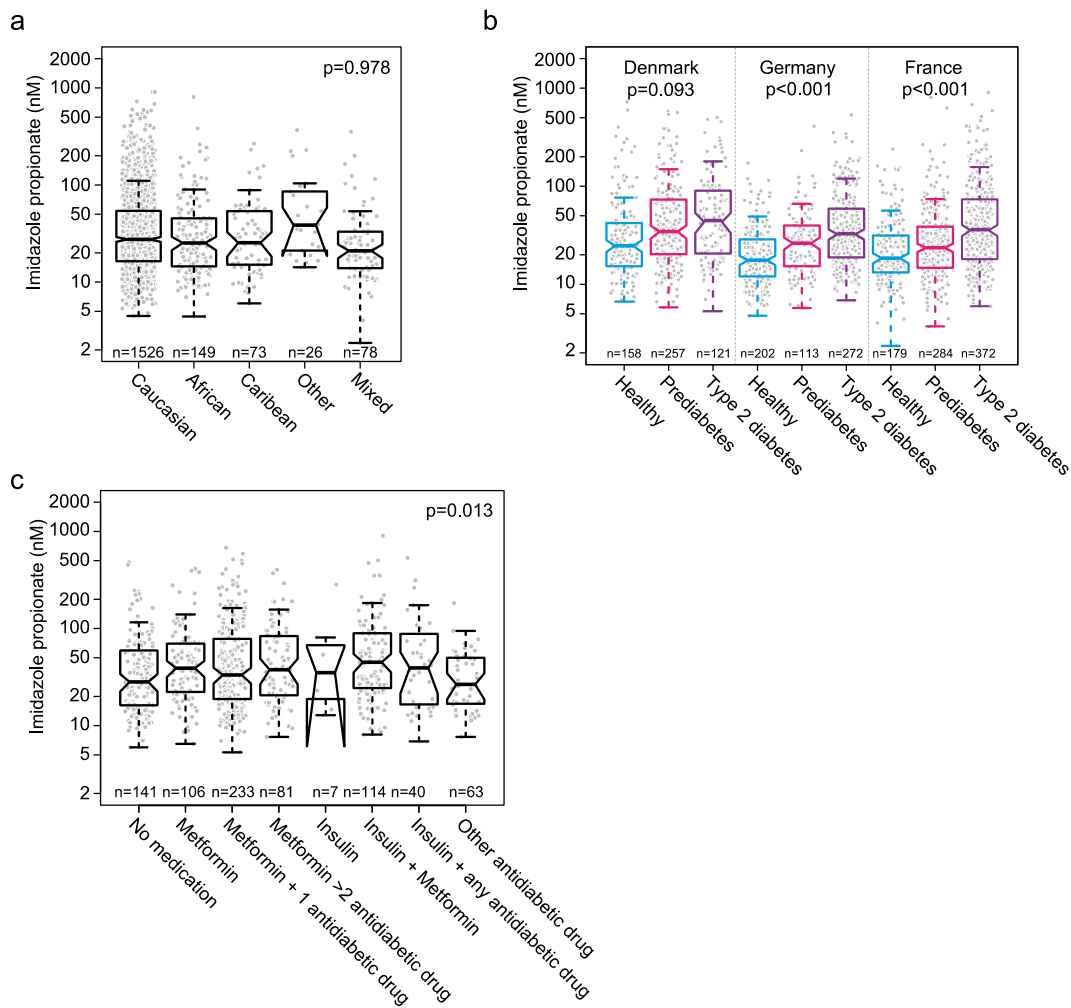

**Supplementary Figure 1: Imidazole propionate levels according to ethnicity, enrolment center and antidiabetic treatment.** Imidazole propionate according to (a) ethnicity (b) enrolment center and (c) type of antidiabetic drugs. p values were calculated with linear regression after adjustment for age, gender, BMI, ethnicity and creatinine clearance when applicable. Data are represented as boxplots: middle line is the median, the lower and upper hinges are the first and third quartiles, the upper whisker extends from the hinge to the largest value no further than  $1.5 \times$  the inter-quartile range (IQR) from the hinge and the lower whisker extends from the hinge to the smallest value at most  $1.5 \times$  IQR of the hinge. Grey dots are single data points. Source data are provided as a Source Data file.

## Supplementary Figure 2

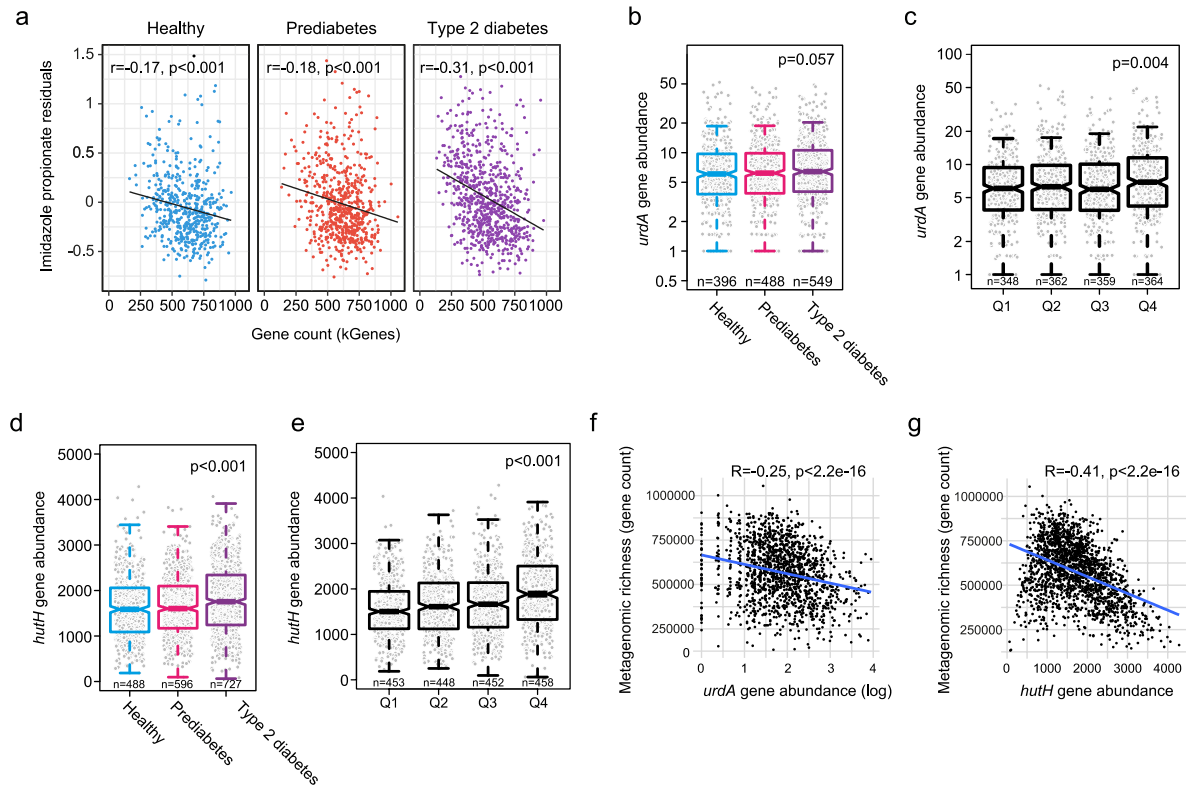

**Supplementary Figure 2: Abundances of *hutH* and *urdA* are negatively correlated with metagenomic richness.** a. Correlation analysis of gene count with imidazole propionate (ImP) residuals according to diabetes status. ImP residuals were calculated using a linear regression adjusted for age, gender, creatinine clearance, BMI and ethnicity. b-e. Relative abundance of *urdA* and *hutH* according to diabetes status and quartiles of serum ImP concentration. p values were calculated with linear regression after adjustment for age, gender, BMI, ethnicity, and creatinine clearance. Data are represented as boxplots: middle line is the median, the lower and upper hinges are the first and third quartiles, the upper whisker extends from the hinge to the largest value no further than  $1.5 \times$  the inter-quartile range (IQR) from the hinge and the lower whisker extends from the hinge to the smallest value at most  $1.5 \times$  IQR of the hinge. Grey dots are single data points. Source data are provided as a Source Data file. Log transformed relative abundance of (f) *urdA* and (g) *hutH* correlations with gene count. Correlations coefficients and p values were determined according to Spearman's method. Source data are provided as a Source Data file.

**Supplementary Table 1**

|            | Quartiles ImP   | Prediabetes         | p value | Type 2 diabetes     | p value |
|------------|-----------------|---------------------|---------|---------------------|---------|
|            |                 | Odds ratio (95% CI) |         | Odds ratio (95% CI) |         |
| Unadjusted | Q1 (<16.2)      | reference           | -       | reference           | -       |
|            | Q2 (13.3-27.2)  | 1.36 (1-1.84)       | 0.048   | 1.45 (1.07-1.97)    | 0.018   |
|            | Q3 (27.3-52.5)  | 2.40 (1.74-3.30)    | <0.001  | 2.82 (2.05-3.89)    | <0.001  |
|            | Q4 (52.7-901.2) | 2.78 (1.96-3.93)    | <0.001  | 5.08 (3.62-7.11)    | <0.001  |
| Model 1    | Q1 (<16.2)      | reference           | -       | reference           | -       |
|            | Q2 (13.3-27.2)  | 1.04 (0.75-1.44)    | 0.832   | 1.03 (0.75-1.47)    | 0.873   |
|            | Q3 (27.3-52.5)  | 1.59 (1.12-2.25)    | 0.009   | 1.63 (1.13-2.37)    | 0.010   |
|            | Q4 (52.7-901.2) | 1.70 (1.16-2.49)    | 0.006   | 2.50 (1.69-3.69)    | <0.001  |
| Model 2    | Q1 (<16.2)      | reference           | -       | reference           | -       |
|            | Q2 (13.3-27.2)  | 1.05 (0.75-1.46)    | 0.986   | 1.07 (0.74-1.52)    | 0.697   |
|            | Q3 (27.3-52.5)  | 1.64 (1.15-2.32)    | 0.007   | 1.74 (1.19-2.53)    | 0.002   |
|            | Q4 (52.7-901.2) | 1.75 (1.18-2.57)    | 0.006   | 2.76 (1.86-4.12)    | <0.001  |

**Supplementary Table 1: Multinomial logistic regression according to quartiles (Q) of imidazole propionate (ImP) for pre- and type 2 diabetes.** p values were calculated using multinomial logistic regression model: unadjusted; Model 1 adjusted for age, gender, BMI, ethnicity; Model 2 adjusted for model 1 plus creatinine clearance.

**Supplementary Table 2**

| <b>Variables</b> | <b>Beta</b> | <b>p.value</b> | <b>q.value</b> | <b>Symbol</b> | <b>Partial correlation coefficient</b> | <b>Group</b> |
|------------------|-------------|----------------|----------------|---------------|----------------------------------------|--------------|
| HbA1c            | 0.193264802 | 1.01E-17       | 6.08E-17       | **            | 0.193264802                            | univariate   |
| Glycemia         | 0.182722316 | 5.75E-16       | 1.72E-15       | **            | 0.182722316                            | univariate   |
| Insulinemia      | 0.150734631 | 3.21E-11       | 4.81E-11       | **            | 0.150734631                            | univariate   |
| HOMA B           | -0.07630798 | 0.001710028    | 0.001710028    | **            | -0.07630798                            | univariate   |
| HOMA IR          | 0.126928962 | 1.69E-07       | 2.03E-07       | **            | 0.126928962                            | univariate   |
| Tyg index        | 0.180890715 | 1.21E-15       | 2.41E-15       | **            | 0.180890715                            | univariate   |
| HbA1c            | 0.120266692 | 1.28E-07       | 7.69E-07       | **            | 0.120266692                            | model1       |
| Glycemia         | 0.074464563 | 0.001103456    | 0.001324147    | **            | 0.074464563                            | model1       |
| Insulinemia      | 0.10397807  | 5.49E-06       | 1.65E-05       | **            | 0.10397807                             | model1       |
| HOMA B           | 0.013925987 | 0.569215607    | 0.569215607    | NA            | -0.013925987                           | model1       |
| HOMA IR          | 0.101783013 | 3.03E-05       | 6.07E-05       | **            | 0.101783013                            | model1       |
| Tyg index        | 0.082762463 | 0.000290413    | 0.00043562     | **            | 0.082762463                            | model1       |
| HbA1c            | 0.132472173 | 6.20E-09       | 3.72E-08       | **            | 0.132472173                            | model2       |
| Glycemia         | 0.088460231 | 0.000108352    | 0.000162528    | **            | 0.088460231                            | model2       |
| Insulinemia      | 0.108929562 | 2.02E-06       | 6.05E-06       | **            | 0.108929562                            | model2       |
| HOMA B           | 0.027212008 | 0.266966584    | 0.266966584    | NA            | -0.027212008                           | model2       |
| HOMA IR          | 0.104699459 | 1.85E-05       | 3.70E-05       | **            | 0.104699459                            | model2       |
| Tyg index        | 0.086233494 | 0.000163049    | 0.000195658    | **            | 0.086233494                            | model2       |
| HbA1c            | 0.063645177 | 0.005405987    | 0.010811974    | **            | 0.063645177                            | model3       |
| Glycemia         | 0.017017798 | 0.457414966    | 0.457414966    | NA            | 0.017017798                            | model3       |
| Insulinemia      | 0.073162097 | 0.001445797    | 0.004337391    | **            | 0.073162097                            | model3       |
| HOMA B           | 0.019927996 | 0.416435872    | 0.457414966    | NA            | 0.019927996                            | model3       |
| HOMA IR          | 0.082409663 | 0.000763002    | 0.004337391    | **            | 0.082409663                            | model3       |
| Tyg index        | 0.034619375 | 0.130822661    | 0.196233991    | NA            | 0.034619375                            | model3       |

**Supplementary Table 2: Pearson partial correlation coefficients for imidazole propionate and markers of impaired glucose metabolism. \*p< 0.05, \*\* False discovery rate (FDR) adjustment for p< 0.05**

**Supplementary Table 3**

|                            | Q1<br>(<16.2)          | Q2<br>(13.3-27.2)      | Q3<br>(27.3-52.5)      | Q4<br>(52.7-901.2)     | p value |
|----------------------------|------------------------|------------------------|------------------------|------------------------|---------|
| n                          | 135                    | 145                    | 149                    | 157                    |         |
| Glucose (nM)               | 6.3 (5.3-7.8)          | 6.2(5.3-7.7)           | 6.6(5.5-8.0)           | 6.6(5.5-8.5)           | 0.053   |
| Insulin (mUI)              | 30.4 (21.4-55.4)       | 32 (18.5-62.10)        | 39.5 (22.4-64.9)       | 38.5 (23.8-62.8)       | 0.020   |
| C-Peptide (ug/L)           | 7.1 (5.4-9.2)          | 7.3 (5.47-10.1)        | 8.1 (6.2-10.1)         | 8.3 (6.4-10.9)         | 0.00014 |
| Stumvoll Sensitivity index | 0.095<br>(0.076-0.104) | 0.092<br>(0.072-0.107) | 0.088<br>(0.058-0.103) | 0.083<br>(0.064-0.102) | 0.004   |

**Supplementary Table 3: 2-hours serum glucose, insulin, C-peptide levels and Stumvoll Sensitivity Index after oral glucose tolerance according to quartiles levels of imidazole propionate according to imidazole propionate quartiles (Q).** Data obtained from a subset of MetaCardis cohort (n=586). p values were calculated using linear regression model.

## Supplementary Table 4

| Variables                       | Increase in node purity | Correlation coefficient | p.value     | q.value     | Correlation with ImP |
|---------------------------------|-------------------------|-------------------------|-------------|-------------|----------------------|
| Coprococcus_comes               | 1.642573604             | -0.111181168            | 1.82E-06    | 2.79E-06    | negative             |
| Dorea_formicigenerans           | 1.463595845             | -0.086671259            | 0.000202257 | 0.00022473  | negative             |
| Dorea_longicatena               | 0.971225794             | -0.048780758            | 0.036719761 | 0.03865238  | negative             |
| Eubacterium_eligens             | 1.037167562             | -0.176461943            | 2.71E-14    | 7.74E-14    | negative             |
| Faecalibacterium_prausnitzii    | 1.483652523             | -0.094512417            | 5.04E-05    | 5.93E-05    | negative             |
| Subdoligranulum_variabile       | 0.870215223             | -0.047930151            | 0.040130833 | 0.040130833 | negative             |
| Bacteroides_dorei_vulgatus      | 0.9239209               | 0.144232609             | 5.47E-10    | 1.37E-09    | positive             |
| Bacteroides_ovatus              | 1.065662996             | 0.096007322             | 3.82E-05    | 5.09E-05    | positive             |
| Bacteroides_xylanisolvens       | 1.073375974             | 0.122428856             | 1.45E-07    | 2.41E-07    | positive             |
| Bifidobacterium_longum          | 1.198733                | 0.13406643              | 8.24E-09    | 1.65E-08    | positive             |
| Clostridium_bartlettii          | 1.032897892             | 0.095581541             | 4.13E-05    | 5.17E-05    | positive             |
| Clostridium_bolteae             | 2.755278513             | 0.200779801             | <1E-16      | <1E-16      | positive             |
| Clostridium_ramosum             | 1.319685722             | 0.209217719             | <1E-16      | <1E-16      | positive             |
| Clostridium_scindens            | 1.223055998             | 0.18799422              | 4.44E-16    | 2.22E-15    | positive             |
| Clostridium_symbiosum           | 1.513025804             | 0.179593848             | 9.33E-15    | 3.11E-14    | positive             |
| Eggerthella_lenta               | 0.908292124             | 0.181936489             | 4.00E-15    | 1.60E-14    | positive             |
| Pseudoflavonifractor_capillosus | 1.127715688             | 0.13260629              | 1.20E-08    | 2.18E-08    | positive             |
| Ruminococcus_gnavus             | 2.150152475             | 0.229083504             | <1E-16      | <1E-16      | positive             |
| Veillonella_atypica             | 0.982732567             | 0.135342806             | 5.92E-09    | 1.32E-08    | positive             |
| Veillonella_parvula             | 1.071466862             | 0.109192132             | 2.77E-06    | 3.96E-06    | positive             |

**Supplementary Table 4: 20 most significant mOTUs correlated with imidazole propionate (ImP) residuals.** p values were calculated using random forest models using ImP residuals adjusted for age, gender, BMI, diabetes status, ethnicity and creatinine clearance.

**Supplementary Table 5**

| <b>Variable</b>  | <b>p.value</b> | <b>q.value</b> | <b>Symbol</b> | <b>Correlation coefficient</b> | <b>Model</b> |
|------------------|----------------|----------------|---------------|--------------------------------|--------------|
| Leucocytes       | 3.08E-06       | 3.08E-05       | **            | 0.10555127                     | univariate   |
| Neutrophiles (%) | 0.00884815     | 0.01313202     | **            | 0.05943668                     | univariate   |
| Monocytes (%)    | 0.0210675      | 0.02633438     | **            | 0.05238389                     | univariate   |
| Lymphocytes (%)  | 6.44E-06       | 3.22E-05       | **            | -0.102249                      | univariate   |
| CRP              | 0.00919241     | 0.01313202     | **            | 0.05895879                     | univariate   |
| IL6              | 0.00111824     | 0.00223648     | **            | 0.07369097                     | univariate   |
| IL7              | 0.33594449     | 0.37327166     | NA            | 0.02201118                     | univariate   |
| CXCL5            | 0.00100789     | 0.00223648     | **            | -0.0751252                     | univariate   |
| CCL2             | 0.88309579     | 0.88309579     | NA            | 0.00336417                     | univariate   |
| IP10             | 0.00013878     | 0.00046259     | **            | 0.08700918                     | univariate   |
| Leucocytes       | 1.76E-05       | 0.00017647     | **            | 0.09756958                     | model1       |
| Neutrophiles (%) | 0.41655824     | 0.41655824     | NA            | 0.01853656                     | model1       |
| Monocytes (%)    | 0.39312409     | 0.41655824     | NA            | -0.0194846                     | model1       |
| Lymphocytes (%)  | 0.12307443     | 0.30768607     | NA            | -0.0351756                     | model1       |
| CRP              | 0.01876555     | 0.06255185     | *             | 0.0534228                      | model1       |
| IL6              | 0.19412404     | 0.35365525     | NA            | 0.02951581                     | model1       |
| IL7              | 0.40102096     | 0.41655824     | NA            | 0.01929247                     | model1       |
| CXCL5            | 0.21219315     | 0.35365525     | NA            | -0.0286566                     | model1       |
| CCL2             | 0.35167293     | 0.41655824     | NA            | 0.02139516                     | model1       |
| IP10             | 0.00937464     | 0.0468732      | **            | 0.05963739                     | model1       |
| Leucocytes       | 8.42E-06       | 8.42E-05       | **            | 0.10140385                     | model2       |
| Neutrophiles (%) | 0.40779257     | 0.40779257     | NA            | 0.01892187                     | model2       |
| Monocytes (%)    | 0.40487431     | 0.40779257     | NA            | -0.0190399                     | model2       |
| Lymphocytes (%)  | 0.1210296      | 0.30257399     | NA            | -0.0354333                     | model2       |
| CRP              | 0.03197909     | 0.10659695     | *             | 0.04887145                     | model2       |
| IL6              | 0.40652149     | 0.40779257     | NA            | 0.018914                       | model2       |
| IL7              | 0.37371592     | 0.40779257     | NA            | 0.02047806                     | model2       |
| CXCL5            | 0.22959003     | 0.40779257     | NA            | -0.0276555                     | model2       |
| CCL2             | 0.3250122      | 0.40779257     | NA            | 0.02265707                     | model2       |
| IP10             | 0.00835926     | 0.04179628     | **            | 0.06066178                     | model2       |
| Leucocytes       | 0.00018792     | 0.00187916     | **            | 0.08511174                     | model3       |
| Neutrophiles (%) | 0.35921965     | 0.39894512     | NA            | 0.0209629                      | model3       |
| Monocytes (%)    | 0.39894512     | 0.39894512     | NA            | -0.0192862                     | model3       |
| Lymphocytes (%)  | 0.07156601     | 0.14313202     | NA            | -0.0411849                     | model3       |
| CRP              | 0.04675287     | 0.14313202     | *             | 0.045329                       | model3       |
| IL6              | 0.34379238     | 0.39894512     | NA            | 0.02157755                     | model3       |
| IL7              | 0.29801169     | 0.39894512     | NA            | 0.02396364                     | model3       |
| CXCL5            | 0.06806751     | 0.14313202     | NA            | -0.0420004                     | model3       |
| CCL2             | 0.32574169     | 0.39894512     | NA            | 0.02262894                     | model3       |
| IP10             | 0.00584179     | 0.02920893     | **            | 0.06341798                     | model3       |



**Supplementary Table 5: Partial correlation matrix for imidazole propionate serum levels and serum inflammatory markers.** \* $p < 0.05$ , \*\*  $p < 0.01$ . C-reactive protein (CRP), Interleukin 6 (IL6), Interleukin 7 (IL7), Interferon gamma-induced protein 10 (IP10), C-X-C motif chemokine 5 (CXCL5), chemokine (C-C motif) ligand 2 (CCL2)

**Supplementary Table 6**

| Variable          | p.value     | q.value     | Symbol | Correlation coefficient | Model      |
|-------------------|-------------|-------------|--------|-------------------------|------------|
| B Lymphocytes (%) | 0.120215493 | 0.160287324 | NA     | -0.067514351            | univariate |
| T Lymphocytes (%) | 0.033761353 | 0.067522706 | *      | -0.092147541            | univariate |
| TREG (%)          | 0.178289621 | 0.178289621 | NA     | 0.068123836             | univariate |
| MAIT (%)          | 0.001171391 | 0.004685563 | **     | -0.163354602            | univariate |
| B Lymphocytes (%) | 0.472175061 | 0.472175061 | NA     | -0.031565502            | model1     |
| T Lymphocytes (%) | 0.157643112 | 0.236464668 | NA     | -0.06199588             | model1     |
| TREG (%)          | 0.121887816 | 0.236464668 | NA     | 0.079281388             | model1     |
| MAIT (%)          | 0.00011929  | 0.00011929  | **     | -0.195595633            | model1     |
| B Lymphocytes (%) | 0.929908301 | 0.929908301 | NA     | -0.003881631            | model2     |
| T Lymphocytes (%) | 0.383894415 | 0.575841623 | NA     | -0.038411337            | model2     |
| TREG (%)          | 0.076412368 | 0.229237103 | NA     | 0.091248324             | model2     |
| MAIT (%)          | 0.000276514 | 0.000276514 | **     | -0.186015512            | model2     |
| B Lymphocytes (%) | 0.231749669 | 0.231749669 | NA     | -0.052787583            | model3     |
| T Lymphocytes (%) | 0.167892937 | 0.231749669 | NA     | -0.060857804            | model3     |
| TREG (%)          | 0.050515821 | 0.151547462 | NA     | 0.100795064             | model3     |
| MAIT (%)          | 0.002220664 | 0.002220664 | **     | -0.157089648            | model3     |

**Supplementary Table 6: Partial correlation matrix in a subgroup of patients (n=439) between serum imidazole propionate levels and white blood cells subtype.** \* p<0.05, \*\* p<0.01. Regulatory T cells (TREG, %) and mucosal associated invariant T cell (MAIT, %).

**Supplementary Table 7**

| Co-abundance group | Species                         | Genus                        | Family                 | Order                  | Class                  | Phylum                 | Superkingdom |
|--------------------|---------------------------------|------------------------------|------------------------|------------------------|------------------------|------------------------|--------------|
| CAG00001           | Unclassified                    | Unclassified                 | Unclassified           | Unclassified           | Unclassified           | Unclassified           | Unclassified |
| CAG00002           | Unclassified                    | Unclassified                 | Unclassified           | Unclassified           | Unclassified           | Unclassified           | Unclassified |
| CAG00003           | Unclassified                    | Unclassified                 | Unclassified           | Unclassified           | Unclassified           | Unclassified           | Unclassified |
| CAG00004           | Blastocystis sp. ST4 (obsolete) | Blastocystis                 | unclassified Eukaryota | unclassified Eukaryota | unclassified Eukaryota | unclassified Eukaryota | Eukaryota    |
| CAG00012           | Klebsiella pneumoniae 1         | Klebsiella                   | Enterobacteriaceae     | Enterobacteriales      | Gammaproteobacteria    | Proteobacteria         | Bacteria     |
| CAG00024           | Bacteroides fragilis 1          | Bacteroides                  | Bacteroidaceae         | Bacteroidales          | Bacteroidia            | Bacteroidetes          | Bacteria     |
| CAG00028           | Klebsiella oxytoca              | Klebsiella                   | Enterobacteriaceae     | Enterobacteriales      | Gammaproteobacteria    | Proteobacteria         | Bacteria     |
| CAG01028           | Ruminococcaceae bacterium LM158 | unclassified Ruminococcaceae | Ruminococcaceae        | Clostridiales          | Clostridia             | Firmicutes             | Bacteria     |
| CAG00030           | Enterobacter aerogenes          | Enterobacter                 | Enterobacteriaceae     | Enterobacteriales      | Gammaproteobacteria    | Proteobacteria         | Bacteria     |
| CAG00034           | Enterobacter cloacae 2          | Enterobacter                 | Enterobacteriaceae     | Enterobacteriales      | Gammaproteobacteria    | Proteobacteria         | Bacteria     |
| CAG00062           | Bacteroides salyersiae          | Bacteroides                  | Bacteroidaceae         | Bacteroidales          | Bacteroidia            | Bacteroidetes          | Bacteria     |
| CAG00043           | Enterobacter cloacae 3          | Enterobacter                 | Enterobacteriaceae     | Enterobacteriales      | Gammaproteobacteria    | Proteobacteria         | Bacteria     |
| CAG00044           | Clostridium symbiosum           | Lachnoclostridium            | Lachnospiraceae        | Clostridiales          | Clostridia             | Firmicutes             | Bacteria     |
| CAG00046           | Unclassified                    | Bacteroides                  | Bacteroidaceae         | Bacteroidales          | Bacteroidia            | Bacteroidetes          | Bacteria     |
| CAG00050           | Bacteroides thetaiotaomicron    | Bacteroides                  | Bacteroidaceae         | Bacteroidales          | Bacteroidia            | Bacteroidetes          | Bacteria     |
| CAG00052           | Parabacteroides goldsteinii     | Parabacteroides              | Porphyromonadaceae     | Bacteroidales          | Bacteroidia            | Bacteroidetes          | Bacteria     |
| CAG00054           | Unclassified                    | Unclassified                 | Unclassified           | Unclassified           | Unclassified           | Firmicutes             | Bacteria     |
| CAG00058           | Unclassified                    | Bacteroides                  | Bacteroidaceae         | Bacteroidales          | Bacteroidia            | Bacteroidetes          | Bacteria     |
| CAG00059           | Unclassified                    | Bacteroides                  | Bacteroidaceae         | Bacteroidales          | Bacteroidia            | Bacteroidetes          | Bacteria     |
| CAG00061           | Unclassified                    | Unclassified                 | Unclassified           | Unclassified           | Unclassified           | Unclassified           | Unclassified |
| CAG00066           | Unclassified                    | Bacteroides                  | Bacteroidaceae         | Bacteroidales          | Bacteroidia            | Bacteroidetes          | Bacteria     |
| CAG00146           | Unclassified                    | Butyrivimonas                | Porphyromonadaceae     | Bacteroidales          | Bacteroidia            | Bacteroidetes          | Bacteria     |
| CAG00071           | Bacteroides cellulosilyticus    | Bacteroides                  | Bacteroidaceae         | Bacteroidales          | Bacteroidia            | Bacteroidetes          | Bacteria     |
| CAG00072           | Odoribacter laneus              | Odoribacter                  | Porphyromonadaceae     | Bacteroidales          | Bacteroidia            | Bacteroidetes          | Bacteria     |
| CAG00073           | Unclassified                    | Unclassified                 | Unclassified           | Unclassified           | Unclassified           | Unclassified           | Unclassified |
| CAG00074           | Unclassified                    | Parabacteroides              | Porphyromonadaceae     | Bacteroidales          | Bacteroidia            | Bacteroidetes          | Bacteria     |
| CAG00075           | Unclassified                    | Bacteroides                  | Bacteroidaceae         | Bacteroidales          | Bacteroidia            | Bacteroidetes          | Bacteria     |
| CAG00076           | Unclassified                    | Blautia                      | Lachnospiraceae        | Clostridiales          | Clostridia             | Firmicutes             | Bacteria     |
| CAG00081           | Bacteroides fragilis 2          | Bacteroides                  | Bacteroidaceae         | Bacteroidales          | Bacteroidia            | Bacteroidetes          | Bacteria     |

|          |                                 |                               |                            |                         |                         |                |          |
|----------|---------------------------------|-------------------------------|----------------------------|-------------------------|-------------------------|----------------|----------|
| CAG00083 | Odoribacter sp.<br>CAG:788      | Odoribacter                   | Porphyromonadaceae         | Bacteroidales           | Bacteroidia             | Bacteroidetes  | Bacteria |
| CAG00085 | Unclassified                    | Unclassified                  | Porphyromonadaceae         | Bacteroidales           | Bacteroidia             | Bacteroidetes  | Bacteria |
| CAG00086 | Bacteroides massiliensis        | Bacteroides                   | Bacteroidaceae             | Bacteroidales           | Bacteroidia             | Bacteroidetes  | Bacteria |
| CAG00087 | Unclassified                    | Bacteroides                   | Bacteroidaceae             | Bacteroidales           | Bacteroidia             | Bacteroidetes  | Bacteria |
| CAG00089 | Unclassified                    | Blautia                       | Lachnospiraceae            | Clostridiales           | Clostridia              | Firmicutes     | Bacteria |
| CAG00093 | Klebsiella pneumoniae 2         | Klebsiella                    | Enterobacteriaceae         | Enterobacteriales       | Gammaproteobacteria     | Proteobacteria | Bacteria |
| CAG00098 | Bacteroides fluxus              | Bacteroides                   | Bacteroidaceae             | Bacteroidales           | Bacteroidia             | Bacteroidetes  | Bacteria |
| CAG00105 | Unclassified                    | Bacteroides                   | Bacteroidaceae             | Bacteroidales           | Bacteroidia             | Bacteroidetes  | Bacteria |
| CAG00106 | Unclassified                    | Prevotella                    | Prevotellaceae             | Bacteroidales           | Bacteroidia             | Bacteroidetes  | Bacteria |
| CAG00109 | Unclassified                    | Fusobacterium                 | Fusobacteriaceae           | Fusobacteriales         | Fusobacteriia           | Fusobacteria   | Bacteria |
| CAG00111 | Unclassified                    | Alistipes                     | Rikenellaceae              | Bacteroidales           | Bacteroidia             | Bacteroidetes  | Bacteria |
| CAG00116 | Bacteroides nordii              | Bacteroides                   | Bacteroidaceae             | Bacteroidales           | Bacteroidia             | Bacteroidetes  | Bacteria |
| CAG00117 | Parabacteroides merdae          | Parabacteroides               | Porphyromonadaceae         | Bacteroidales           | Bacteroidia             | Bacteroidetes  | Bacteria |
| CAG00118 | Bacteroides vulgatus            | Bacteroides                   | Bacteroidaceae             | Bacteroidales           | Bacteroidia             | Bacteroidetes  | Bacteria |
| CAG00124 | Klebsiella variicola            | Klebsiella                    | Enterobacteriaceae         | Enterobacteriales       | Gammaproteobacteria     | Proteobacteria | Bacteria |
| CAG00267 | Clostridium sp. CAG:58          | unclassified<br>Clostridiales | unclassified Clostridiales | Clostridiales           | Clostridia              | Firmicutes     | Bacteria |
| CAG00126 | Parabacteroides<br>gordonii     | Parabacteroides               | Porphyromonadaceae         | Bacteroidales           | Bacteroidia             | Bacteroidetes  | Bacteria |
| CAG00128 | Unclassified                    | Blautia                       | Lachnospiraceae            | Clostridiales           | Clostridia              | Firmicutes     | Bacteria |
| CAG00129 | Unclassified                    | Unclassified                  | Desulfovibrionaceae        | Desulfovibrionales      | Deltaproteobacteria     | Proteobacteria | Bacteria |
| CAG00131 | Bacteroides sp.<br>CAG:754      | Bacteroides                   | Bacteroidaceae             | Bacteroidales           | Bacteroidia             | Bacteroidetes  | Bacteria |
| CAG00133 | Unclassified                    | Bacteroides                   | Bacteroidaceae             | Bacteroidales           | Bacteroidia             | Bacteroidetes  | Bacteria |
| CAG00134 | Unclassified                    | Cloacibacillus                | Synergistaceae             | Synergistales           | Synergistia             | Synergistetes  | Bacteria |
| CAG00135 | Bacteroides eggerthii           | Bacteroides                   | Bacteroidaceae             | Bacteroidales           | Bacteroidia             | Bacteroidetes  | Bacteria |
| CAG00384 | Alistipes shahii                | Alistipes                     | Rikenellaceae              | Bacteroidales           | Bacteroidia             | Bacteroidetes  | Bacteria |
| CAG00138 | Unclassified                    | Parabacteroides               | Porphyromonadaceae         | Bacteroidales           | Bacteroidia             | Bacteroidetes  | Bacteria |
| CAG00141 | Parabacteroides<br>distasonis   | Parabacteroides               | Porphyromonadaceae         | Bacteroidales           | Bacteroidia             | Bacteroidetes  | Bacteria |
| CAG00142 | Bacteroides stercoris           | Bacteroides                   | Bacteroidaceae             | Bacteroidales           | Bacteroidia             | Bacteroidetes  | Bacteria |
| CAG00143 | Unclassified                    | unclassified Firmicutes       | unclassified Firmicutes    | unclassified Firmicutes | unclassified Firmicutes | Firmicutes     | Bacteria |
| CAG00144 | Fusobacterium ulcerans          | Fusobacterium                 | Fusobacteriaceae           | Fusobacteriales         | Fusobacteriia           | Fusobacteria   | Bacteria |
| CAG00260 | Acidaminococcus<br>intestinalis | Acidaminococcus               | Acidaminococcaceae         | Selenomonadales         | Negativicutes           | Firmicutes     | Bacteria |
| CAG00153 | Hafnia paralvei                 | Hafnia                        | Enterobacteriaceae         | Enterobacteriales       | Gammaproteobacteria     | Proteobacteria | Bacteria |

|            |                                 |                         |                         |                         |                         |                |              |
|------------|---------------------------------|-------------------------|-------------------------|-------------------------|-------------------------|----------------|--------------|
| CAG00155   | Firmicutes bacterium<br>CAG:424 | unclassified Firmicutes | unclassified Firmicutes | unclassified Firmicutes | unclassified Firmicutes | Firmicutes     | Bacteria     |
| CAG00158   | Unclassified                    | Bacteroides             | Bacteroidaceae          | Bacteroidales           | Bacteroidia             | Bacteroidetes  | Bacteria     |
| CAG00159   | Bacteroides uniformis           | Bacteroides             | Bacteroidaceae          | Bacteroidales           | Bacteroidia             | Bacteroidetes  | Bacteria     |
| CAG00163   | Prevotella sp. CAG:255          | Prevotella              | Prevotellaceae          | Bacteroidales           | Bacteroidia             | Bacteroidetes  | Bacteria     |
| CAG00172   | Unclassified                    | Bacteroides             | Bacteroidaceae          | Bacteroidales           | Bacteroidia             | Bacteroidetes  | Bacteria     |
| CAG00175   | Bacteroides clarus              | Bacteroides             | Bacteroidaceae          | Bacteroidales           | Bacteroidia             | Bacteroidetes  | Bacteria     |
| CAG00005_1 | Unclassified                    | Unclassified            | Unclassified            | Unclassified            | Unclassified            | Firmicutes     | Bacteria     |
| CAG00180   | Unclassified                    | Bacteroides             | Bacteroidaceae          | Bacteroidales           | Bacteroidia             | Bacteroidetes  | Bacteria     |
| CAG00181   | Unclassified                    | Unclassified            | Unclassified            | Unclassified            | Unclassified            | Unclassified   | Unclassified |
| CAG00182   | Unclassified                    | Bacteroides             | Bacteroidaceae          | Bacteroidales           | Bacteroidia             | Bacteroidetes  | Bacteria     |
| CAG00184   | Bacteroides sp.<br>CAG:462      | Bacteroides             | Bacteroidaceae          | Bacteroidales           | Bacteroidia             | Bacteroidetes  | Bacteria     |
| CAG00185   | Veillonella sp.<br>CAG:933      | Veillonella             | Veillonellaceae         | Selenomonadales         | Negativicutes           | Firmicutes     | Bacteria     |
| CAG00191   | Fusobacterium varium            | Fusobacterium           | Fusobacteriaceae        | Fusobacteriales         | Fusobacteriia           | Fusobacteria   | Bacteria     |
| CAG00192   | Unclassified                    | Unclassified            | Unclassified            | Unclassified            | Unclassified            | Firmicutes     | Bacteria     |
| CAG00193   | Unclassified                    | Unclassified            | Unclassified            | Unclassified            | Unclassified            | Firmicutes     | Bacteria     |
| CAG00199   | uncultured Alistipes sp.        | Alistipes               | Rikenellaceae           | Bacteroidales           | Bacteroidia             | Bacteroidetes  | Bacteria     |
| CAG00202   | Parabacteroides<br>johnsonii    | Parabacteroides         | Porphyromonadaceae      | Bacteroidales           | Bacteroidia             | Bacteroidetes  | Bacteria     |
| CAG00206   | Pyramidobacter<br>piscolens     | Pyramidobacter          | Synergistaceae          | Synergistales           | Synergistia             | Synergistetes  | Bacteria     |
| CAG00211   | Firmicutes bacterium<br>CAG:227 | unclassified Firmicutes | unclassified Firmicutes | unclassified Firmicutes | unclassified Firmicutes | Firmicutes     | Bacteria     |
| CAG00213   | Unclassified                    | Prevotella              | Prevotellaceae          | Bacteroidales           | Bacteroidia             | Bacteroidetes  | Bacteria     |
| CAG00214   | Prevotella corporis             | Prevotella              | Prevotellaceae          | Bacteroidales           | Bacteroidia             | Bacteroidetes  | Bacteria     |
| CAG00220   | Unclassified                    | Bacteroides             | Bacteroidaceae          | Bacteroidales           | Bacteroidia             | Bacteroidetes  | Bacteria     |
| CAG00945   | Bacteroides<br>xylanisolvens    | Bacteroides             | Bacteroidaceae          | Bacteroidales           | Bacteroidia             | Bacteroidetes  | Bacteria     |
| CAG00231   | Odoribacter<br>splanchnicus     | Odoribacter             | Porphyromonadaceae      | Bacteroidales           | Bacteroidia             | Bacteroidetes  | Bacteria     |
| CAG00237   | Unclassified                    | Unclassified            | Unclassified            | Unclassified            | Unclassified            | Unclassified   | Unclassified |
| CAG00238   | Clostridium<br>saccharolyticum  | Lachnoclostridium       | Lachnospiraceae         | Clostridiales           | Clostridia              | Firmicutes     | Bacteria     |
| CAG00252   | Unclassified                    | Sutterella              | Sutterellaceae          | Burkholderiales         | Betaproteobacteria      | Proteobacteria | Bacteria     |
| CAG00263   | Klebsiella oxytoca              | Klebsiella              | Enterobacteriaceae      | Enterobacteriales       | Gammaproteobacteria     | Proteobacteria | Bacteria     |
| CAG00280   | Prevotella sp. CAG:485          | Prevotella              | Prevotellaceae          | Bacteroidales           | Bacteroidia             | Bacteroidetes  | Bacteria     |
| CAG00287   | Prevotella sp.<br>CAG:1124      | Prevotella              | Prevotellaceae          | Bacteroidales           | Bacteroidia             | Bacteroidetes  | Bacteria     |

|            |                                 |                               |                            |                         |                         |                |              |
|------------|---------------------------------|-------------------------------|----------------------------|-------------------------|-------------------------|----------------|--------------|
| CAG00292   | Unclassified                    | Unclassified                  | Unclassified               | Unclassified            | Unclassified            | Unclassified   | Unclassified |
| CAG00293   | Firmicutes bacterium<br>CAG:145 | unclassified Firmicutes       | unclassified Firmicutes    | unclassified Firmicutes | unclassified Firmicutes | Firmicutes     | Bacteria     |
| CAG00298   | Bacteroides intestinalis<br>1   | Bacteroides                   | Bacteroidaceae             | Bacteroidales           | Bacteroidia             | Bacteroidetes  | Bacteria     |
| CAG00299   | Unclassified                    | Unclassified                  | Unclassified               | Unclassified            | Unclassified            | Proteobacteria | Bacteria     |
| CAG00309   | Alistipes onderdonkii           | Alistipes                     | Rikenellaceae              | Bacteroidales           | Bacteroidia             | Bacteroidetes  | Bacteria     |
| CAG00310   | Sutterella parvirubra           | Sutterella                    | Sutterellaceae             | Burkholderiales         | Betaproteobacteria      | Proteobacteria | Bacteria     |
| CAG00312   | Unclassified                    | Unclassified                  | Unclassified               | Unclassified            | Unclassified            | Bacteroidetes  | Bacteria     |
| CAG00314   | Unclassified                    | Alistipes                     | Rikenellaceae              | Bacteroidales           | Bacteroidia             | Bacteroidetes  | Bacteria     |
| CAG00315   | Citrobacter freundii            | Citrobacter                   | Enterobacteriaceae         | Enterobacteriales       | Gammaproteobacteria     | Proteobacteria | Bacteria     |
| CAG00319   | Unclassified                    | Unclassified                  | Unclassified               | Unclassified            | Unclassified            | Unclassified   | Unclassified |
| CAG00321   | Clostridium sp.<br>CAG:138      | unclassified<br>Clostridiales | unclassified Clostridiales | Clostridiales           | Clostridia              | Firmicutes     | Bacteria     |
| CAG00325   | Unclassified                    | Parasutterella                | Sutterellaceae             | Burkholderiales         | Betaproteobacteria      | Proteobacteria | Bacteria     |
| CAG00332   | Unclassified                    | Parabacteroides               | Porphyromonadaceae         | Bacteroidales           | Bacteroidia             | Bacteroidetes  | Bacteria     |
| CAG00334   | Prevotella sp.<br>CAG:1092      | Prevotella                    | Prevotellaceae             | Bacteroidales           | Bacteroidia             | Bacteroidetes  | Bacteria     |
| CAG00019_1 | Intestinibacter bartlettii      | Intestinibacter               | Peptostreptococcaceae      | Clostridiales           | Clostridia              | Firmicutes     | Bacteria     |
| CAG00340   | Unclassified                    | unclassified<br>Clostridiales | unclassified Clostridiales | Clostridiales           | Clostridia              | Firmicutes     | Bacteria     |
| CAG00344   | Unclassified                    | Unclassified                  | Unclassified               | Bacteroidales           | Bacteroidia             | Bacteroidetes  | Bacteria     |
| CAG00352   | Unclassified                    | Acidaminococcus               | Acidaminococcaceae         | Selenomonadales         | Negativicutes           | Firmicutes     | Bacteria     |
| CAG00355   | Bacteroides sp.<br>CAG:661      | Bacteroides                   | Bacteroidaceae             | Bacteroidales           | Bacteroidia             | Bacteroidetes  | Bacteria     |
| CAG00357   | Bacteroides ovatus              | Bacteroides                   | Bacteroidaceae             | Bacteroidales           | Bacteroidia             | Bacteroidetes  | Bacteria     |
| CAG00360   | Alistipes finegoldii            | Alistipes                     | Rikenellaceae              | Bacteroidales           | Bacteroidia             | Bacteroidetes  | Bacteria     |
| CAG00361   | Unclassified                    | Acidaminococcus               | Acidaminococcaceae         | Selenomonadales         | Negativicutes           | Firmicutes     | Bacteria     |
| CAG00364   | Blautia hansenii                | Blautia                       | Lachnospiraceae            | Clostridiales           | Clostridia              | Firmicutes     | Bacteria     |
| CAG00367   | Firmicutes bacterium<br>CAG:170 | unclassified Firmicutes       | unclassified Firmicutes    | unclassified Firmicutes | unclassified Firmicutes | Firmicutes     | Bacteria     |
| CAG00368   | Unclassified                    | Alistipes                     | Rikenellaceae              | Bacteroidales           | Bacteroidia             | Bacteroidetes  | Bacteria     |
| CAG00370   | Unclassified                    | Unclassified                  | Unclassified               | Bacteroidales           | Bacteroidia             | Bacteroidetes  | Bacteria     |
| CAG00371   | Bacteroides dorei               | Bacteroides                   | Bacteroidaceae             | Bacteroidales           | Bacteroidia             | Bacteroidetes  | Bacteria     |
| CAG00373   | Unclassified                    | Unclassified                  | Unclassified               | Clostridiales           | Clostridia              | Firmicutes     | Bacteria     |
| CAG00375   | Unclassified                    | Prevotella                    | Prevotellaceae             | Bacteroidales           | Bacteroidia             | Bacteroidetes  | Bacteria     |
| CAG00381   | Clostridium sp.<br>CAG:242      | unclassified<br>Clostridiales | unclassified Clostridiales | Clostridiales           | Clostridia              | Firmicutes     | Bacteria     |
| CAG00401   | Prevotella sp. CAG:592          | Prevotella                    | Prevotellaceae             | Bacteroidales           | Bacteroidia             | Bacteroidetes  | Bacteria     |

|            |                                 |                               |                            |                         |                         |                |              |
|------------|---------------------------------|-------------------------------|----------------------------|-------------------------|-------------------------|----------------|--------------|
| CAG00405   | Unclassified                    | unclassified Firmicutes       | unclassified Firmicutes    | unclassified Firmicutes | unclassified Firmicutes | Firmicutes     | Bacteria     |
| CAG00412   | Unclassified                    | Prevotella                    | Prevotellaceae             | Bacteroidales           | Bacteroidia             | Bacteroidetes  | Bacteria     |
| CAG00416   | Lelliottia amnigena             | Lelliottia                    | Enterobacteriaceae         | Enterobacteriales       | Gammaproteobacteria     | Proteobacteria | Bacteria     |
| CAG00421   | Unclassified                    | Alistipes                     | Rikenellaceae              | Bacteroidales           | Bacteroidia             | Bacteroidetes  | Bacteria     |
| CAG00424   | Firmicutes bacterium<br>CAG:137 | unclassified Firmicutes       | unclassified Firmicutes    | unclassified Firmicutes | unclassified Firmicutes | Firmicutes     | Bacteria     |
| CAG00436   | Clostridium sp.<br>CAG:299      | unclassified<br>Clostridiales | unclassified Clostridiales | Clostridiales           | Clostridia              | Firmicutes     | Bacteria     |
| CAG00016_2 | Unclassified                    | Prevotella                    | Prevotellaceae             | Bacteroidales           | Bacteroidia             | Bacteroidetes  | Bacteria     |
| CAG00458   | Fusobacterium<br>nucleatum      | Fusobacterium                 | Fusobacteriaceae           | Fusobacteriales         | Fusobacteriia           | Fusobacteria   | Bacteria     |
| CAG00467   | Prevotella sp. CAG:873          | Prevotella                    | Prevotellaceae             | Bacteroidales           | Bacteroidia             | Bacteroidetes  | Bacteria     |
| CAG00479   | Unclassified                    | Alistipes                     | Rikenellaceae              | Bacteroidales           | Bacteroidia             | Bacteroidetes  | Bacteria     |
| CAG00489   | Unclassified                    | Unclassified                  | Unclassified               | Unclassified            | Unclassified            | Unclassified   | Unclassified |
| CAG00497   | Unclassified                    | unclassified Firmicutes       | unclassified Firmicutes    | unclassified Firmicutes | unclassified Firmicutes | Firmicutes     | Bacteria     |
| CAG00499   | Prevotella sp. CAG:891          | Prevotella                    | Prevotellaceae             | Bacteroidales           | Bacteroidia             | Bacteroidetes  | Bacteria     |
| CAG00505   | Unclassified                    | Unclassified                  | Unclassified               | Unclassified            | Unclassified            | Firmicutes     | Bacteria     |
| CAG00510   | Unclassified                    | Alistipes                     | Rikenellaceae              | Bacteroidales           | Bacteroidia             | Bacteroidetes  | Bacteria     |
| CAG00521   | Prevotella sp.<br>CAG:1058      | Prevotella                    | Prevotellaceae             | Bacteroidales           | Bacteroidia             | Bacteroidetes  | Bacteria     |
| CAG00529   | Prevotella sp.<br>CAG:1185      | Prevotella                    | Prevotellaceae             | Bacteroidales           | Bacteroidia             | Bacteroidetes  | Bacteria     |
| CAG00533   | Unclassified                    | Unclassified                  | Unclassified               | Unclassified            | Unclassified            | Firmicutes     | Bacteria     |
| CAG00549   | Bifidobacterium longum          | Bifidobacterium               | Bifidobacteriaceae         | Bifidobacteriales       | Actinobacteria          | Actinobacteria | Bacteria     |
| CAG00578   | Alistipes putredinis            | Alistipes                     | Rikenellaceae              | Bacteroidales           | Bacteroidia             | Bacteroidetes  | Bacteria     |
| CAG00586   | Unclassified                    | Blautia                       | Lachnospiraceae            | Clostridiales           | Clostridia              | Firmicutes     | Bacteria     |
| CAG00596   | Unclassified                    | unclassified<br>Clostridiales | unclassified Clostridiales | Clostridiales           | Clostridia              | Firmicutes     | Bacteria     |
| CAG00600   | Prevotella sp.<br>CAG:1031      | Prevotella                    | Prevotellaceae             | Bacteroidales           | Bacteroidia             | Bacteroidetes  | Bacteria     |
| CAG00608   | Unclassified                    | Alistipes                     | Rikenellaceae              | Bacteroidales           | Bacteroidia             | Bacteroidetes  | Bacteria     |
| CAG00609   | Bacteroides sp.<br>CAG:770      | Bacteroides                   | Bacteroidaceae             | Bacteroidales           | Bacteroidia             | Bacteroidetes  | Bacteria     |
| CAG00629   | Firmicutes bacterium<br>CAG:124 | unclassified Firmicutes       | unclassified Firmicutes    | unclassified Firmicutes | unclassified Firmicutes | Firmicutes     | Bacteria     |
| CAG00634   | Unclassified                    | Prevotella                    | Prevotellaceae             | Bacteroidales           | Bacteroidia             | Bacteroidetes  | Bacteria     |
| CAG00642   | Unclassified                    | Prevotella                    | Prevotellaceae             | Bacteroidales           | Bacteroidia             | Bacteroidetes  | Bacteria     |
| CAG00647   | Unclassified                    | Sutterella                    | Sutterellaceae             | Burkholderiales         | Betaproteobacteria      | Proteobacteria | Bacteria     |
| CAG00655   | Unclassified                    | Alistipes                     | Rikenellaceae              | Bacteroidales           | Bacteroidia             | Bacteroidetes  | Bacteria     |
| CAG00660   | Alistipes timonensis            | Alistipes                     | Rikenellaceae              | Bacteroidales           | Bacteroidia             | Bacteroidetes  | Bacteria     |

|          |                                    |                                 |                              |                         |                         |                |              |
|----------|------------------------------------|---------------------------------|------------------------------|-------------------------|-------------------------|----------------|--------------|
| CAG00664 | Alistipes sp. CAG:268              | Alistipes                       | Rikenellaceae                | Bacteroidales           | Bacteroidia             | Bacteroidetes  | Bacteria     |
| CAG00672 | Clostridium sp. CAG:169            | unclassified Clostridiales      | unclassified Clostridiales   | Clostridiales           | Clostridia              | Firmicutes     | Bacteria     |
| CAG00694 | Unclassified                       | Unclassified                    | Unclassified                 | Bacteroidales           | Bacteroidia             | Bacteroidetes  | Bacteria     |
| CAG00699 | Veillonella ratti                  | Veillonella                     | Veillonellaceae              | Selenomonadales         | Negativicutes           | Firmicutes     | Bacteria     |
| CAG00701 | Unclassified                       | Bacteroides                     | Bacteroidaceae               | Bacteroidales           | Bacteroidia             | Bacteroidetes  | Bacteria     |
| CAG00705 | Prevotella sp. CAG:520             | Prevotella                      | Prevotellaceae               | Bacteroidales           | Bacteroidia             | Bacteroidetes  | Bacteria     |
| CAG00712 | Unclassified                       | Unclassified                    | Unclassified                 | Unclassified            | Unclassified            | Proteobacteria | Bacteria     |
| CAG00731 | Parasutterella excrementihominis 2 | Parasutterella                  | Sutterellaceae               | Burkholderiales         | Betaproteobacteria      | Proteobacteria | Bacteria     |
| CAG00734 | Bacteroides sp. CAG:545            | Bacteroides                     | Bacteroidaceae               | Bacteroidales           | Bacteroidia             | Bacteroidetes  | Bacteria     |
| CAG00737 | Unclassified                       | Alistipes                       | Rikenellaceae                | Bacteroidales           | Bacteroidia             | Bacteroidetes  | Bacteria     |
| CAG00739 | Unclassified                       | Unclassified                    | Unclassified                 | Unclassified            | Unclassified            | Unclassified   | Unclassified |
| CAG00751 | Firmicutes bacterium CAG:238       | unclassified Firmicutes         | unclassified Firmicutes      | unclassified Firmicutes | unclassified Firmicutes | Firmicutes     | Bacteria     |
| CAG00961 | Unclassified                       | Ruminococcaceae bacterium LM158 | unclassified Ruminococcaceae | Ruminococcaceae         | Clostridiales           | Clostridia     | Firmicutes   |
| CAG00757 | Bacteroides sp. CAG:709            | Bacteroides                     | Bacteroidaceae               | Bacteroidales           | Bacteroidia             | Bacteroidetes  | Bacteria     |
| CAG00798 | Unclassified                       | Unclassified                    | Unclassified                 | Unclassified            | Unclassified            | Unclassified   | Unclassified |
| CAG00802 | Unclassified                       | Cloacibacillus                  | Synergistaceae               | Synergistales           | Synergistia             | Synergistetes  | Bacteria     |
| CAG00810 | Unclassified                       | Unclassified                    | Unclassified                 | Bacteroidales           | Bacteroidia             | Bacteroidetes  | Bacteria     |
| CAG00819 | Acidaminococcus sp. CAG:542        | Acidaminococcus                 | Acidaminococcaceae           | Selenomonadales         | Negativicutes           | Firmicutes     | Bacteria     |
| CAG00836 | Fusobacterium gonidiaformans       | Fusobacterium                   | Fusobacteriaceae             | Fusobacteriales         | Fusobacteriia           | Fusobacteria   | Bacteria     |
| CAG00849 | Unclassified                       | Unclassified                    | Unclassified                 | Clostridiales           | Clostridia              | Firmicutes     | Bacteria     |
| CAG00853 | Unclassified                       | Unclassified                    | Unclassified                 | Bacteroidales           | Bacteroidia             | Bacteroidetes  | Bacteria     |
| CAG00858 | Streptococcus thermophilus         | Streptococcus                   | Streptococcaceae             | Lactobacillales         | Bacilli                 | Firmicutes     | Bacteria     |
| CAG00860 | Unclassified                       | Unclassified                    | Unclassified                 | Unclassified            | Unclassified            | Unclassified   | Unclassified |
| CAG00862 | Unclassified                       | Unclassified                    | Unclassified                 | Unclassified            | Unclassified            | Unclassified   | Unclassified |
| CAG00873 | Unclassified                       | Butyrivimonas                   | Porphyromonadaceae           | Bacteroidales           | Bacteroidia             | Bacteroidetes  | Bacteria     |
| CAG00878 | Citrobacter koseri                 | Citrobacter                     | Enterobacteriaceae           | Enterobacteriales       | Gammaproteobacteria     | Proteobacteria | Bacteria     |
| CAG00883 | Escherichia coli                   | Escherichia                     | Enterobacteriaceae           | Enterobacteriales       | Gammaproteobacteria     | Proteobacteria | Bacteria     |
| CAG00887 | Alistipes sp. CAG:435              | Alistipes                       | Rikenellaceae                | Bacteroidales           | Bacteroidia             | Bacteroidetes  | Bacteria     |
| CAG00899 | Unclassified                       | Alistipes                       | Rikenellaceae                | Bacteroidales           | Bacteroidia             | Bacteroidetes  | Bacteria     |
| CAG00908 | Unclassified                       | Intestinibacter                 | Peptostreptococcaceae        | Clostridiales           | Clostridia              | Firmicutes     | Bacteria     |



|            |                                              |                                    |                                 |                         |                         |                |              |
|------------|----------------------------------------------|------------------------------------|---------------------------------|-------------------------|-------------------------|----------------|--------------|
| CAG00909   | Parasutterella<br>excrementihominis 1        | Parasutterella                     | Sutterellaceae                  | Burkholderiales         | Betaproteobacteria      | Proteobacteria | Bacteria     |
| CAG00942   | Prevotella disiens                           | Prevotella                         | Prevotellaceae                  | Bacteroidales           | Bacteroidia             | Bacteroidetes  | Bacteria     |
| CAG00977   | Unclassified                                 | Unclassified                       | Unclassified                    | Unclassified            | Unclassified            | Unclassified   | Unclassified |
| CAG01026   | Peptoniphilus harei                          | Peptoniphilus                      | Peptoniphilaceae                | Clostridiales           | Clostridia              | Firmicutes     | Bacteria     |
| CAG01069   | Unclassified                                 | Unclassified                       | Unclassified                    | Unclassified            | Unclassified            | Unclassified   | Unclassified |
| CAG01127   | Unclassified                                 | Prevotella                         | Prevotellaceae                  | Bacteroidales           | Bacteroidia             | Bacteroidetes  | Bacteria     |
| CAG01130   | Prevotella bivia                             | Prevotella                         | Prevotellaceae                  | Bacteroidales           | Bacteroidia             | Bacteroidetes  | Bacteria     |
| CAG01145   | Unclassified                                 | Bacteroides                        | Bacteroidaceae                  | Bacteroidales           | Bacteroidia             | Bacteroidetes  | Bacteria     |
| CAG01165   | common Bacteroides<br>xylanisolvens & ovatus | Bacteroides                        | Bacteroidaceae                  | Bacteroidales           | Bacteroidia             | Bacteroidetes  | Bacteria     |
| CAG01190   | Butyricimonas virosa                         | Butyricimonas                      | Porphyromonadaceae              | Bacteroidales           | Bacteroidia             | Bacteroidetes  | Bacteria     |
| CAG01195   | Unclassified                                 | Ruminococcaceae<br>bacterium LM158 | unclassified<br>Ruminococcaceae | Ruminococcaceae         | Clostridiales           | Clostridia     | Firmicutes   |
| CAG00006_3 | Unclassified                                 | Oscillibacter                      | Oscillospiraceae                | Clostridiales           | Clostridia              | Firmicutes     | Bacteria     |
| CAG01273   | Enterobacter<br>hormaechei                   | Enterobacter                       | Enterobacteriaceae              | Enterobacteriales       | Gammaproteobacteria     | Proteobacteria | Bacteria     |
| CAG01278   | Unclassified                                 | unclassified Firmicutes            | unclassified Firmicutes         | unclassified Firmicutes | unclassified Firmicutes | Firmicutes     | Bacteria     |
| CAG01289   | Unclassified                                 | Alistipes                          | Rikenellaceae                   | Bacteroidales           | Bacteroidia             | Bacteroidetes  | Bacteria     |
| CAG01339   | Peptoniphilus lacrimalis                     | Peptoniphilus                      | Peptoniphilaceae                | Clostridiales           | Clostridia              | Firmicutes     | Bacteria     |
| CAG01342   | Unclassified                                 | Ruminococcaceae<br>bacterium LM158 | unclassified<br>Ruminococcaceae | Ruminococcaceae         | Clostridiales           | Clostridia     | Firmicutes   |
| CAG01368   | Unclassified                                 | Unclassified                       | Unclassified                    | Bacteroidales           | Bacteroidia             | Bacteroidetes  | Bacteria     |
| CAG01383   | Unclassified                                 | Prevotella                         | Prevotellaceae                  | Bacteroidales           | Bacteroidia             | Bacteroidetes  | Bacteria     |
| CAG01394   | Unclassified                                 | Blautia                            | Lachnospiraceae                 | Clostridiales           | Clostridia              | Firmicutes     | Bacteria     |

**Supplementary Table 7: List of metagenomic species with *hutH* gene**

**Supplementary Table 8**

| Variable        | Beta         | p.value     | q.value     | Symbol | Partial correlation coefficient |
|-----------------|--------------|-------------|-------------|--------|---------------------------------|
| Red meat        | -0.048231823 | 0.054272277 | 0.090453795 | NA     | -0.048231823                    |
| Poultry         | -0.053262171 | 0.033531458 | 0.083828644 | *      | -0.053262171                    |
| Fish            | -0.030800834 | 0.219198624 | 0.27399828  | NA     | -0.030800834                    |
| Milk            | 0.045786356  | 0.067704697 | 0.101557046 | NA     | 0.045786356                     |
| Cheese          | 0.063674572  | 0.011022329 | 0.055111643 | *      | 0.063674572                     |
| Yogurt          | 0.012433233  | 0.619986229 | 0.66427096  | NA     | 0.012433233                     |
| Eggs            | 0.015007503  | 0.549473646 | 0.634008053 | NA     | 0.015007503                     |
| Starch          | -0.001099461 | 0.965025799 | 0.965025799 | NA     | -0.001099461                    |
| Vegetables      | -0.055208206 | 0.027563531 | 0.082690593 | *      | -0.055208206                    |
| Fruits          | -0.05057615  | 0.043557643 | 0.089518713 | *      | -0.05057615                     |
| Nuts            | -0.090414244 | 0.000302418 | 0.004536277 | **     | -0.090414244                    |
| Energy intake   | -0.020608008 | 0.410954473 | 0.513693091 | NA     | -0.020608008                    |
| Carbohydrate    | 0.031437497  | 0.209816158 | 0.349693597 | NA     | 0.031437497                     |
| Sugar           | 0.005947827  | 0.812495558 | 0.812495558 | NA     | 0.005947827                     |
| Fibre           | -0.054125575 | 0.030759543 | 0.117435205 | *      | -0.054125575                    |
| Fat             | -0.008905001 | 0.722478691 | 0.802754101 | NA     | -0.008905001                    |
| Unsaturated fat | -0.063547293 | 0.011183934 | 0.111839337 | *      | -0.063547293                    |
| Saturated fat   | 0.052762661  | 0.035230561 | 0.117435205 | *      | 0.052762661                     |
| Protein         | -0.043095393 | 0.085525298 | 0.213813244 | NA     | -0.043095393                    |
| Animal protein  | -0.024239688 | 0.333620594 | 0.476600849 | NA     | -0.024239688                    |
| Vegetal protein | -0.033820829 | 0.177273707 | 0.349693597 | NA     | -0.033820829                    |
| aHEI score      | -0.079267542 | 0.001544139 | 0.011581041 | **     | -0.079267542                    |
| DASH score      | -0.04442065  | 0.076325173 | 0.104079782 | NA     | -0.04442065                     |
| DDS score       | -0.049608171 | 0.047743314 | 0.089518713 | *      | -0.049608171                    |
| Med Diet Score  | -0.060186549 | 0.016284221 | 0.06106583  | *      | -0.060186549                    |

**Supplementary Table 8: Pearson partial correlation coefficients for imidazole propionate and dietary nutrients and scores.** p values were calculated using partial correlations adjusted for: age, gender, body mass index, ethnicity, diabetes status, creatinine clearance, daily energy intake (kcal/day) and enrolment center. \*  $p < 0.05$ , \*\* False discovery rate (FDR) adjusted  $p < 0.05$ .
